# Supplementary material for: FexSplice: A LightGBM-Based Model for Predicting the Splicing Effect of a Single Nucleotide Variant Affecting the First Nucleotide G of an Exon
Source: MDPI journal article supplement (doi:10.3390/genes14091765), 2023-09-06
Supplement: s1 [file s1]

**Supplementary Table S3. Comparison of 9 statistical measures of FexSplice, SpliceAI, and CI-SpliceAI**

| Model                    | FexSplice <sup>b</sup><br>(15-feature<br>based<br>LightGBM) | SpliceAI <sup>c</sup> | CI-SpliceAI <sup>c</sup> |
|--------------------------|-------------------------------------------------------------|-----------------------|--------------------------|
| Accuracy <sup>a</sup>    | 0.77 ± 0.07                                                 | 0.54                  | 0.58                     |
| Precision <sup>a</sup>   | 0.80 ± 0.12                                                 | 0.85                  | 0.82                     |
| Recall <sup>a</sup>      | 0.78 ± 0.13                                                 | 0.22                  | 0.22                     |
| Specificity <sup>a</sup> | 0.77 ± 0.15                                                 | 0.95                  | 0.95                     |
| F1 score <sup>a</sup>    | 0.77 ± 0.07                                                 | 0.35                  | 0.34                     |
| NPV <sup>a</sup>         | 0.79 ± 0.11                                                 | 0.49                  | 0.55                     |
| MCC <sup>a</sup>         | 0.57 ± 0.15                                                 | 0.24                  | 0.25                     |
| AUROC                    | 0.86 ± 0.08                                                 | 0.69                  | 0.65                     |
| AUPRC                    | 0.87 ± 0.09                                                 | 0.75                  | 0.68                     |

<sup>a</sup>Refer to Table 1 for the definitions of statistical measures.

<sup>b</sup>Statistical measures for FexSplice were calculated by 10-fold cross-validation (mean and SD) of our dataset, and are identical to those shown in Table 1.

<sup>c</sup>Statistical measures for SpliceAI and CI-SpliceAI are calculated by our dataset without cross-validation. Note that FexSplice was trained with our dataset, whereas the others were not.
