# Supplementary material for: FexSplice: A LightGBM-Based Model for Predicting the Splicing Effect of a Single Nucleotide Variant Affecting the First Nucleotide G of an Exon
Source: MDPI journal article supplement (doi:10.3390/genes14091765), 2023-09-06
Supplement: s1 [file s1]

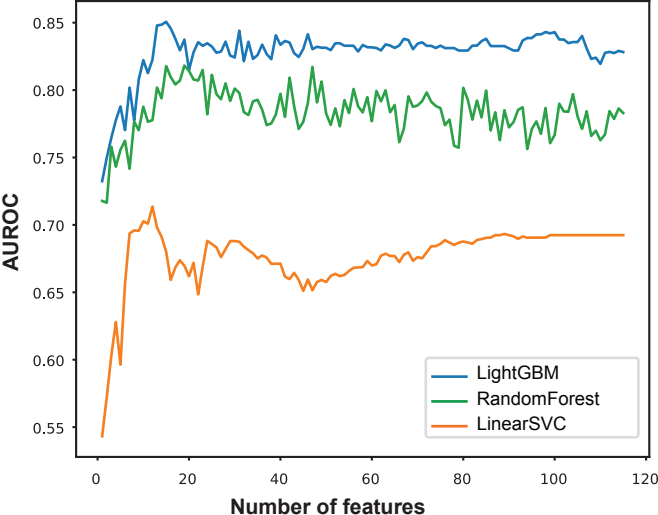

**Supplementary Figure S2.** Feature elimination of LinearSVC, RandomForest, and LightGBM models. Features were eliminated one-by-one by LOOCV using SelectFromModel. Area-under-the-receiver-operating-characteristics-curve (AUROC) is plotted.
