# Supplementary material for: FexSplice: A LightGBM-Based Model for Predicting the Splicing Effect of a Single Nucleotide Variant Affecting the First Nucleotide G of an Exon
Source: MDPI journal article supplement (doi:10.3390/genes14091765), 2023-09-06
Supplement: s1 [file s1]

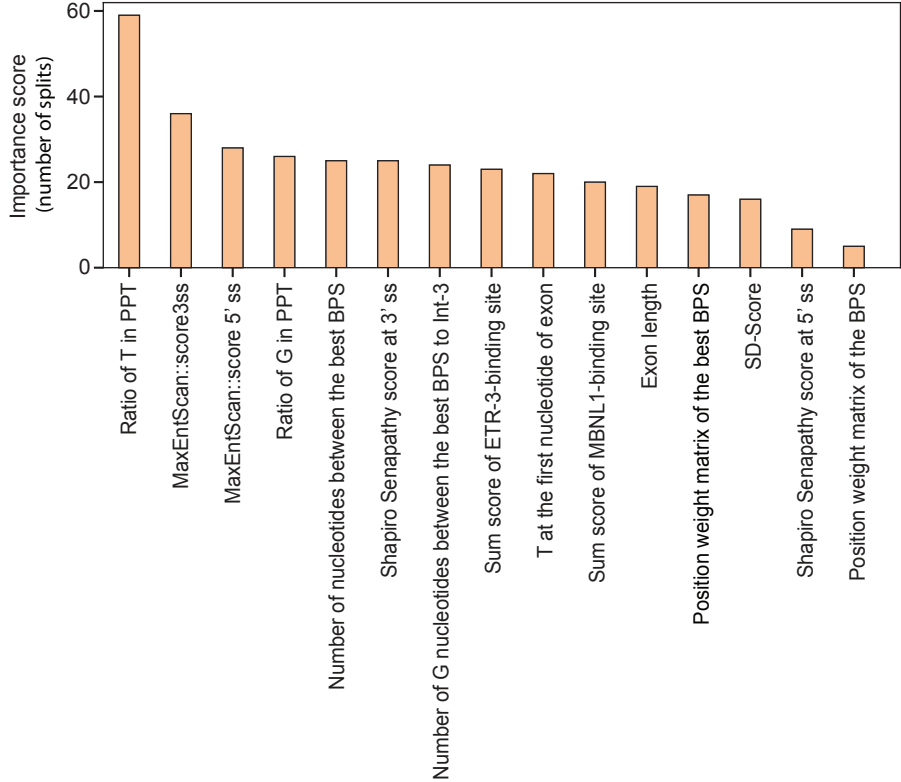

**Supplementary Figure S3.** Feature importance of 15 feature-based LightGBM models by 10-fold cross-validation. The feature importance is represented by the number of times each feature is used to split the data across all trees in the ensemble. Features with higher importance values have a more significant impact on the model.
