# Supplementary material for: FexSplice: A LightGBM-Based Model for Predicting the Splicing Effect of a Single Nucleotide Variant Affecting the First Nucleotide G of an Exon
Source: MDPI journal article supplement (doi:10.3390/genes14091765), 2023-09-06

Supplementary Figure S1. Heatmap of Spearman's correlation coefficients of 115 feature values to indicate multiple collinearity of features.

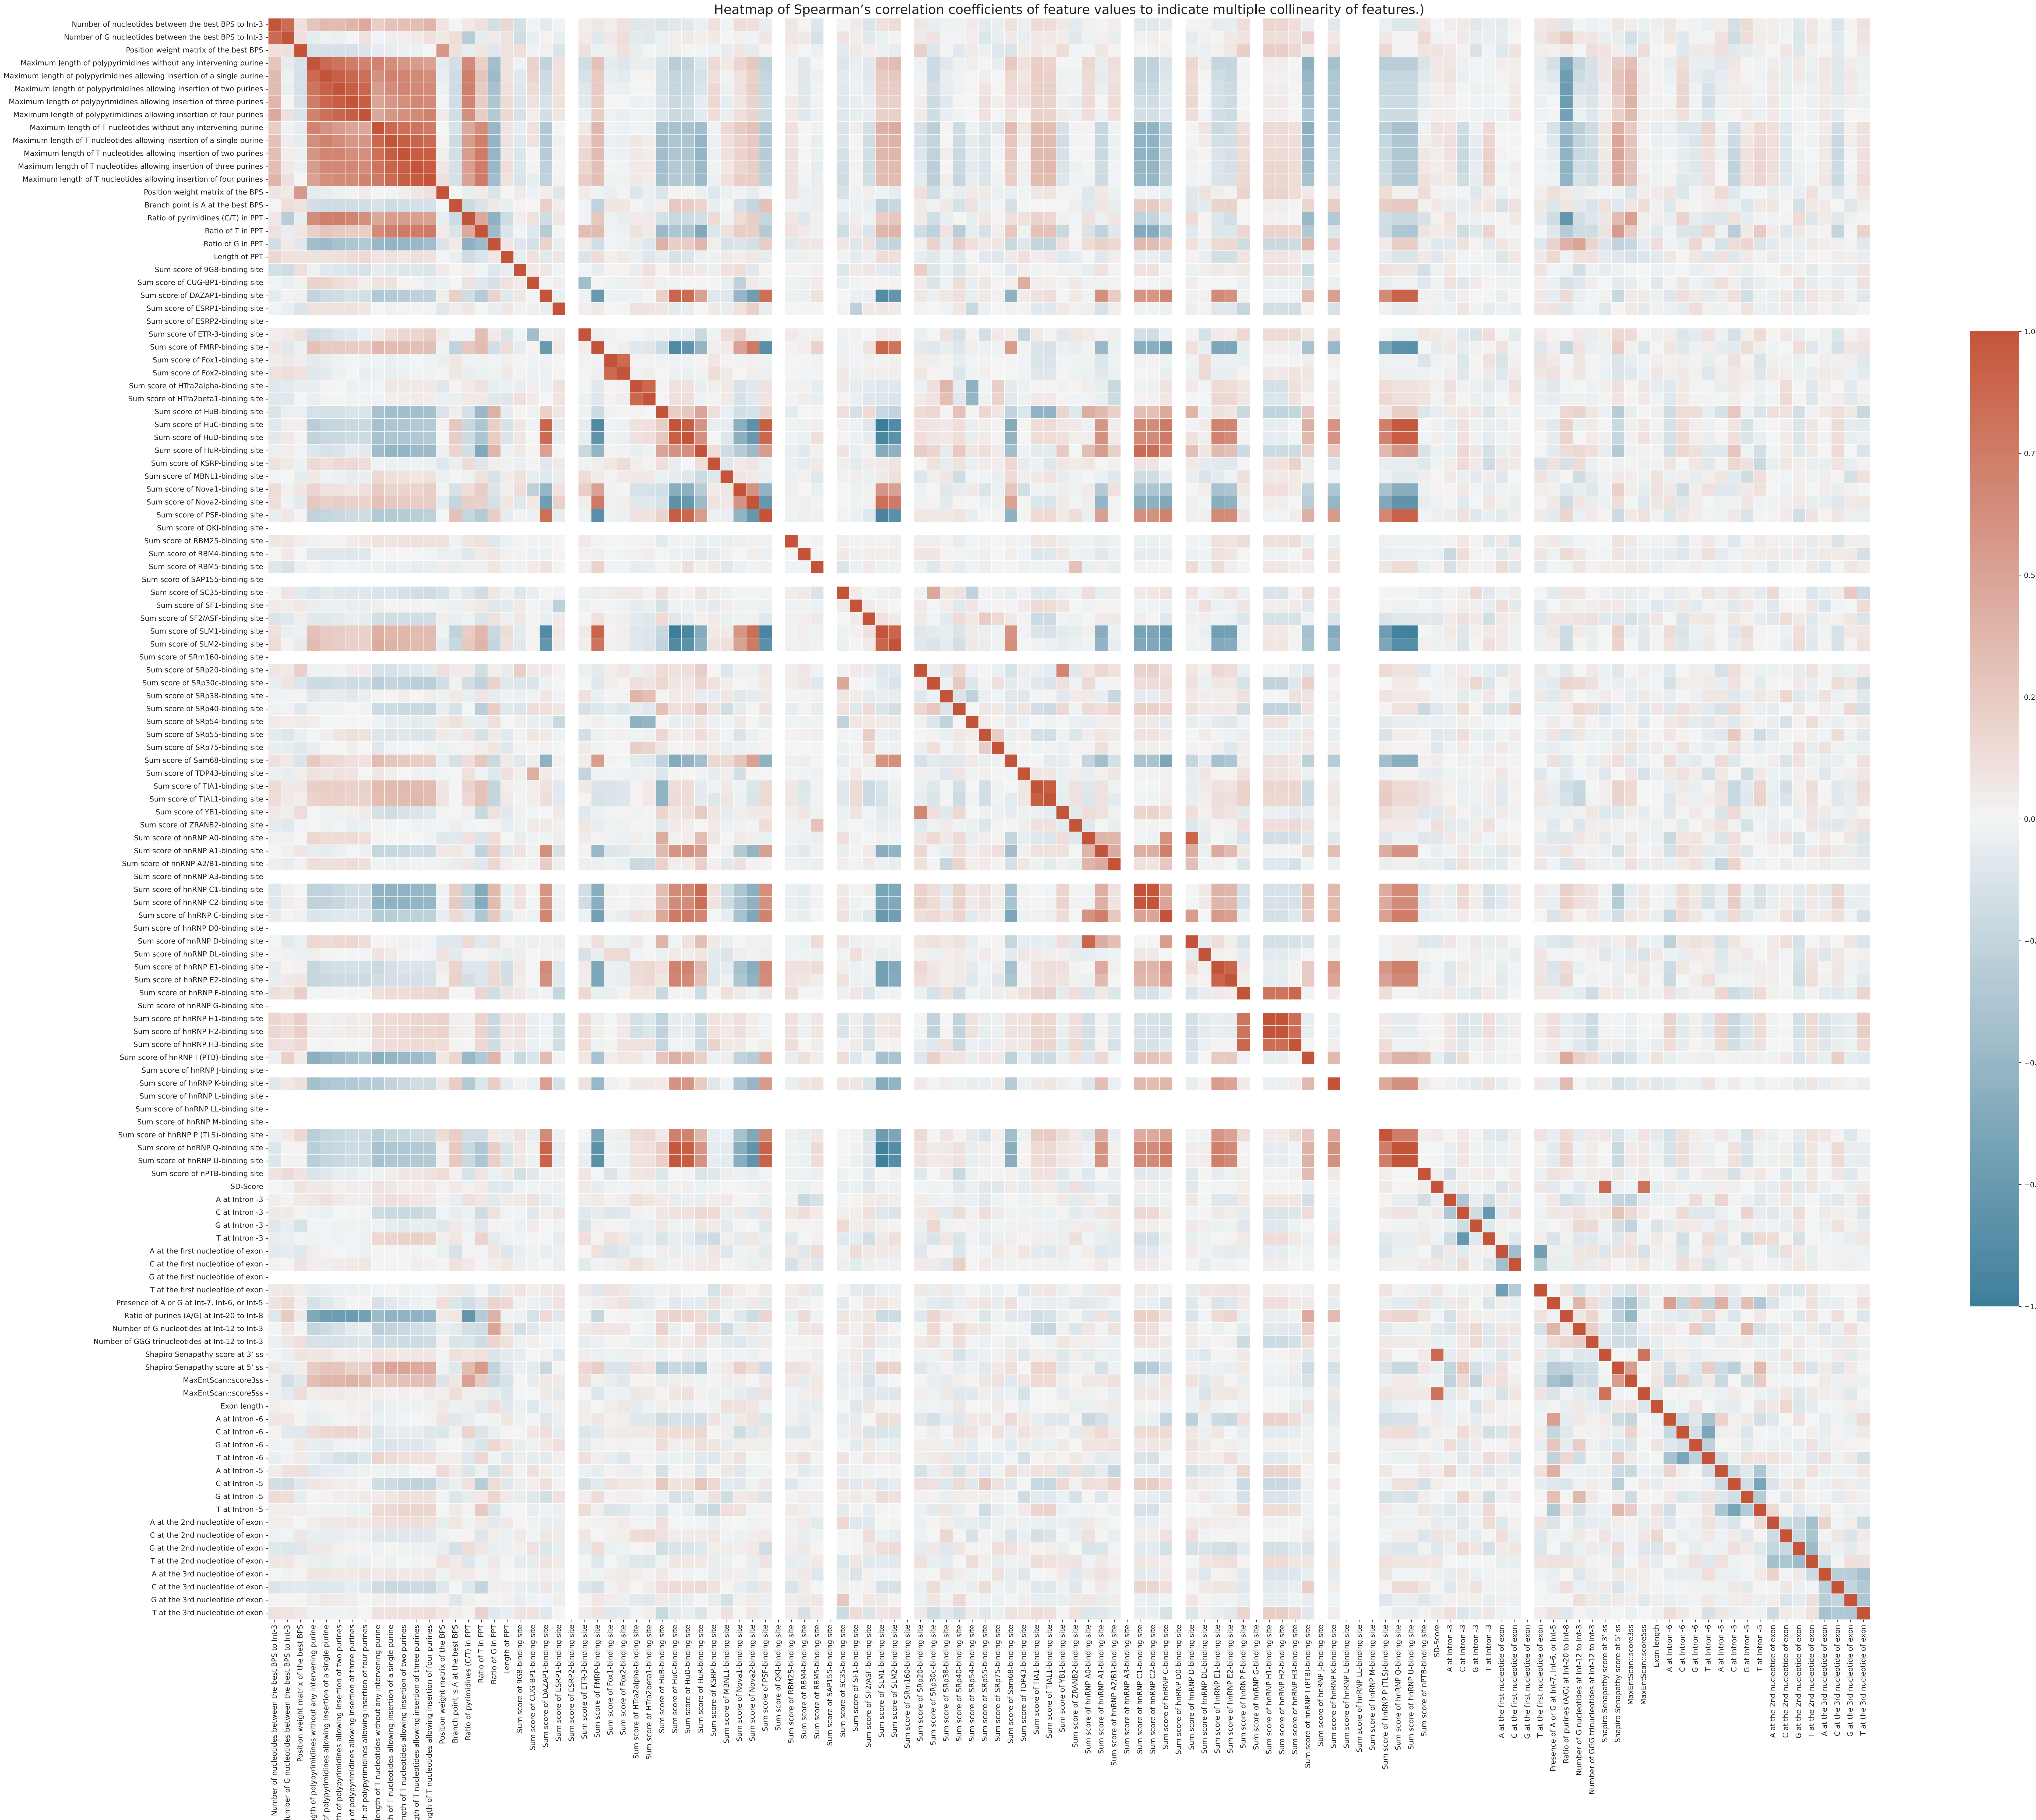

Supplement: s1 [file s1]
