# Supplementary material for: FexSplice: A LightGBM-Based Model for Predicting the Splicing Effect of a Single Nucleotide Variant Affecting the First Nucleotide G of an Exon
Source: Genes (Basel). 2023 Sep 6;14(9):1765. doi: 10.3390/genes14091765 (PMC10531444; doi:10.3390/genes14091765)
Supplement: Supplementary file 1 [file genes-14-01765-s001.zip]

Archive with 6 entries (6 files):
- Fig S1.pdf
- Fig S2.pdf
- Fig S3.pdf
- Supplementary Table S1.xlsx
- Supplementary Table S2.pdf
- Supplementary Table S3.pdf
