# Supplementary material for: FexSplice: A LightGBM-Based Model for Predicting the Splicing Effect of a Single Nucleotide Variant Affecting the First Nucleotide G of an Exon
Source: Genes (Basel). 2023 Sep 6;14(9):1765. doi: 10.3390/genes14091765 (PMC10531444; doi:10.3390/genes14091765)
Supplement: Supplementary file 1 [file genes-14-01765-s001.zip › Supplementary Table S1.xlsx]

## Sheet: Splice-affecting
Supplementary Table S1a. 106 splicing-affecting Fex-SNVs
Chrom	GRLCh37/hg19	Strand	Ref	Alt	Gene	HGMD Pro	dbSNP	ClinVar	References
chr1	25628011	+	G	A	RHD	CM158948			[1]
chr1	25628011	+	G	T	RHD	CM015885			[2,3]
chr1	25648380	+	G	C	RHD	CM994726	rs71652374		[1,3,4]
chr1	25648380	+	G	A	RHD	CM151427	rs71652374		[1,3]
chr1	25648380	+	G	T	RHD	CS195090	rs71652374		[3,5]
chr1	68912543	-	C	A	RPE65	CM057739	rs61751278	98901	[6,7]
chr1	94502906	-	C	T	ABCA4	CM042265	rs146786552	497057	[8]
chr1	94517254	-	C	G	ABCA4	CM970003	rs76157638	7879	[9]
chr1	94577135	-	C	T	ABCA4	CM990012	rs150774447	99065	[10]
chr1	156106712	+	G	T	LMNA	CM111724	rs267607642	66819	[11]
chr1	161139450	+	G	T	PPOX	CS2016162			[12]
chr1	169493142	-	C	T	F5	CM121362	rs377182698		[13]
chr1	200534797	-	C	A	KIF14	CM1714541	rs981349334	503569	[14]
chr1	201332534	-	C	T	TNNT2	CS157686			[15]
chr1	205767943	-	C	A	SLC41A1	CS1311814		1192530	[16]
chr2	27672429	-	C	T	IFT172	CS1311174	rs62131872		[17]
chr2	47703506	+	G	T	MSH2	CM122694	rs63751640	90854	[18]
chr2	71186148	+	G	T	ATP6V1B1	CM023016			[19]
chr2	85778733	-	C	G	GGCX		rs1167981434		[20]
chr2	166616080	-	C	T	GALNT3	CS094124			[7,21]
chr2	166789567	-	C	A	TTC21B	CS110678	rs764523560	1502824	[7]
chr3	10089601	+	G	T	FANCD2	CS135080	rs529893298	929651	[22]
chr3	33110462	-	C	A	GLB1	CS094660			[7,23]
chr3	46942515	+	G	T	PTH1R	CS139503	rs113755495		[24]
chr3	48610781	-	C	G	COL7A1	CM992852			[7,25]
chr3	48619192	-	C	G	COL7A1	CM960406			[7]
chr3	184070598	-	C	T	CLCN2	CM030647	rs137852681	9037	[26,27]
chr3	190126103	+	G	A	CLDN16	CM993498	rs104893723	5928	[28]
chr3	190126103	+	G	C	CLDN16	CM014950	rs104893723	5928	[28]
chr3	193360554	+	G	T	OPA1	CS168739			[29]
chr3	193372651	+	G	A	OPA1	CM094168			[30]
chr4	88533257	+	G	T	DSPP	CM010217 (G>T)	rs121912987	16856	[31]
chr4	88533257	+	G	A	DSPP				[31]
chr4	88533257	+	G	C	DSPP				[31]
chr4	88967794	+	G	T	PKD2	CM121801	rs886041114	811865	[32]
chr4	100512808	+	G	T	MTTP	CS115635	rs1326084943		[33]
chr5	37008725	+	G	T	NIPBL	CM1812458	rs727503769	180193	[7,34]
chr5	69372348	+	G	C	SMN2		rs752716074	2337011	[35]
chr5	70247768	+	G	C	SMN1	CM983408	rs77969175	1929368	[35]
chr5	112111326	+	G	T	APC	CS043349	rs863224458	216017	[36,37]
chr5	112164553	+	G	T	APC	CS133902		490221	[26,38]
chr5	112170648	+	G	T	APC	CM083580		1012192	[7,39]
chr6	49574634	-	C	A	RHAG	CS991495	rs121918589	13066	[26,40]
chr6	51909886	-	C	A	PKHD1	CM051136			[27]
chr6	132168916	+	G	T	ENPP1	CM2014482	rs1199396446		[41]
chr7	33059336	-	C	G	NT5C3A	CS032414	rs550090926		[26,42]
chr7	33059336	-	C	A	NT5C3A		rs550090926		[26,42]
chr7	94049853	+	G	T	COL1A2	CM127973		851896	[27]
chr7	94052269	+	G	A	COL1A2	CM1611608			[43]
chr7	106897239	-	C	A	COG5	CS1211721	rs773453129	932930	[44]
chr7	117170953	+	G	T	CFTR	CM920143	rs121908751	7186	[25,45]
chr7	117170953	+	G	A	CFTR	CM940239	rs121908751	7181	[46]
chr7	117234984	+	G	T	CFTR	CM960283	rs397508387	53501	[46-48]
chr7	143018808	+	G	T	CLCN1	CM139464		4628446	[49]
chr8	72156927	-	C	A	EYA1	CS066282		1699634	[26,27]
chr8	118819616	-	C	G	EXT1	CS063300			[7,50]
chr8	133935583	+	G	T	TG	CS119083			[51]
chr9	34513110	+	G	A	DNAI1	CM152113	rs376252276	65703	[52,53]
chr9	34648759	+	G	A	GALT				[54]
chr9	99003189	-	C	T	HSD17B3	CM154899	rs768355659		[55]
chr9	130579482	-	C	A	ENG	CM111552		1076795	[56]
chr10	73434869	+	G	C	CDH23	CS021739		1941002	[7,57]
chr10	90773100	+	G	T	FAS				[26]
chr11	44193161	+	G	A	EXT2	CS063301			[7]
chr11	47370092	-	C	G	MYBPC3	CM043535	rs397516068	42784	[11,58,86]
chr11	47370092	-	C	A	MYBPC3	CM106111	rs397516068	188531	[11,86]
chr11	61165246	+	G	C	TMEM216	CS103901	rs386833830	200	[59]
chr11	103191758	+	G	A	DYNC2H1	CS110317	rs201479015	30350	[7]
chr11	108121428	+	G	T	ATM	CS145383	rs79220522	584777	[26,60]
chr11	108165654	+	G	T	ATM	CS031768			[26]
chr11	108203489	+	G	T	ATM	CS092583		557639	[61]
chr12	58158994	-	C	T	CYP27B1	CM166934			[62]
chr12	58186769	+	G	A	TSFM	CS1911411	rs1180813038		[63]
chr13	32900636	+	G	C	BRCA2	CS181557	rs397507768	182177	[64]
chr13	32900636	+	G	T	BRCA2	CS129229	rs397507768	51805	[65,66]
chr13	32918695	+	G	A	BRCA2			926077	[67]
chr13	32918695	+	G	C	BRCA2			52212	[67]
chr13	48954189	+	G	T	RB1	CM063089			[68]
chr13	48955383	+	G	T	RB1	CS083260		649781	[69]
chr13	100982815	+	G	T	PCCA	CS066304		550273	[70]
chr14	23374662	-	C	T	RBM23				[56]
chr14	39627606	-	C	T	TRAPPC6B	CS1618025	rs369085598		[71]
chr15	42681126	+	G	T	CAPN3	CM1821497	rs779701414	284946	[27]
chr15	42681126	+	G	C	CAPN3	CS076603	rs779701414	284946	[7]
chr15	42694322	+	G	T	CAPN3	CM077513		863674	[27]
chr16	3789725	-	C	A	CREBBP				[72]
chr16	31499359	+	G	C	SLC5A2	CM1213269	rs778273828	887915	[73]
chr16	71022036	-	C	A	HYDIN	CS128789	rs397515413	39698	[74]
chr17	29556853	+	G	T	NF1	CM153411		1702852	[75]
chr17	48265510	-	C	T	COL1A1	CM1912064		373106	[76]
chr17	61995496	-	C	T	GH1	CS085917		15985	[77]
chr17	61995496	-	C	A	GH1	CS021001		15985	[27]
chr17	66519866	+	G	T	PRKAR1A	CS045218			[78]
chr17	66521895	+	G	A	PRKAR1A	CS093307	rs773162575	1423807	[7]
chr18	55221656	-	C	A	FECH	CS951414	rs765518889	623168	[25,27]
chr18	60035934	+	G	T	TNFRSF11A	CS1917868			[79]
chr19	12989648	-	C	G	DNASE2	CS1718885		1686899	[80]
chr21	43905914	-	C	T	RSPH1	CS138602	rs797045148		[81]
chrX	37664259	+	G	C	CYBB	CM167208			[7,82]
chrX	69247707	+	G	T	EDA	CS113716			[7]
chrX	77275741	+	G	A	ATP7A	CM053113		2571400	[83]
chrX	100611256	-	C	A	BTK	CM066741			[26]
chrX	100614335	-	C	A	BTK	CS057514			[26]
chrX	148582568	-	C	A	IDS	CM064055			[84]
chrX	154130442	-	C	T	F8	CM100253		811156	[7]
chrX	154215580	-	C	T	F8	CM082652			[85]
References
1	Raud, L.; Ka, C.; Gourlaouen, I.; Callebaut, I.; Férec, C.; Le Gac, G.; Fichou, Y. Functional analysis of novel RHD variants: splicing disruption is likely to be a common mechanism of variant D phenotype. Transfusion 2019, 59, 1367-1375, doi:10.1111/trf.15210.
2	Wagner, F.F.; Frohmajer, A.; Flegel, W.A. RHD positive haplotypes in D negative Europeans. BMC Genet 2001, 2, 10, doi:10.1186/1471-2156-2-10.
3	Fichou, Y.; Gehannin, P.; Corre, M.; Le Guern, A.; Le Maréchal, C.; Le Gac, G.; Férec, C. Extensive functional analyses of RHD splice site variants: Insights into the potential role of splicing in the physiology of Rh. Transfusion 2015, 55, 1432-1443, doi:10.1111/trf.13083.
4	Wagner, F.F.; Gassner, C.; Müller, T.H.; Schönitzer, D.; Schunter, F.; Flegel, W.A. Molecular basis of weak D phenotypes. Blood 1999, 93, 385-393.
5	Qian, C.; Li, Q.; Yuan, C.; Bao, Y.; Yu, S.; Li, S.; Wang, Y.; Tao, Z.; Zhong, J. A new RhD variant allele is caused by a RhD 26 T > G mutation in a Chinese Han woman with a weak D phenotype. Transfusion 2019, 59, 1400-1401, doi:10.1111/trf.15135.
6	Sitorus, R.S.; Lorenz, B.; Preising, M.N. Analysis of three genes in Leber congenital amaurosis in Indonesian patients. Vision Res 2003, 43, 3087-3093, doi:10.1016/j.visres.2003.08.008.
7	Danis, D.; Jacobsen, J.O.B.; Carmody, L.C.; Gargano, M.A.; McMurry, J.A.; Hegde, A.; Haendel, M.A.; Valentini, G.; Smedley, D.; Robinson, P.N. Interpretable prioritization of splice variants in diagnostic next-generation sequencing. Am J Hum Genet 2021, 108, 1564-1577, doi:10.1016/j.ajhg.2021.06.014.
8	Khan, M.; Cornelis, S.S.; Khan, M.I.; Elmelik, D.; Manders, E.; Bakker, S.; Derks, R.; Neveling, K.; van de Vorst, M.; Gilissen, C.; et al. Cost-effective molecular inversion probe-based ABCA4 sequencing reveals deep-intronic variants in Stargardt disease. Hum Mutat 2019, 40, 1749-1759, doi:10.1002/humu.23787.
9	Sangermano, R.; Garanto, A.; Khan, M.; Runhart, E.H.; Bauwens, M.; Bax, N.M.; van den Born, L.I.; Khan, M.I.; Cornelis, S.S.; Verheij, J.; et al. Deep-intronic ABCA4 variants explain missing heritability in Stargardt disease and allow correction of splice defects by antisense oligonucleotides. Genet Med 2019, 21, 1751-1760, doi:10.1038/s41436-018-0414-9.
10	Fadaie, Z.; Khan, M.; Del Pozo-Valero, M.; Cornelis, S.S.; Ayuso, C.; Cremers, F.P.M.; Roosing, S.; The Abca Study, G. Identification of splice defects due to noncanonical splice site or deep-intronic variants in ABCA4. Hum Mutat 2019, 40, 2365-2376, doi:10.1002/humu.23890.
11	Ito, K.; Patel, P.N.; Gorham, J.M.; McDonough, B.; DePalma, S.R.; Adler, E.E.; Lam, L.; MacRae, C.A.; Mohiuddin, S.M.; Fatkin, D.; et al. Identification of pathogenic gene mutations in LMNA and MYBPC3 that alter RNA splicing. Proc Natl Acad Sci U S A 2017, 114, 7689-7694, doi:10.1073/pnas.1707741114.
12	Cho, S.Y.; Lau, E.Y.; Luk, D.C.; Law, C.Y.; Lai, C.K.; Lam, C.W. Novel PPOX exonic mutation inducing aberrant splicing in a patient with homozygous variegate porphyria. Clin Chim Acta 2021, 512, 117-120, doi:10.1016/j.cca.2020.10.033.
13	Paraboschi, E.M.; Menegatti, M.; Peyvandi, F.; Duga, S.; Asselta, R. Understanding the Impact of Aberrant Splicing in Coagulation Factor V Deficiency. Int J Mol Sci 2019, 20, doi:10.3390/ijms20040910.
14	Moawia, A.; Shaheen, R.; Rasool, S.; Waseem, S.S.; Ewida, N.; Budde, B.; Kawalia, A.; Motameny, S.; Khan, K.; Fatima, A.; et al. Mutations of KIF14 cause primary microcephaly by impairing cytokinesis. Ann Neurol 2017, 82, 562-577, doi:10.1002/ana.25044.
15	Millat, G.; Lafont, E.; Nony, S.; Rouvet, I.; Bozon, D. Functional characterization of putative novel splicing mutations in the cardiomyopathy-causing genes. DNA Cell Biol 2015, 34, 489-496, doi:10.1089/dna.2015.2842.
16	Hurd, T.W.; Otto, E.A.; Mishima, E.; Gee, H.Y.; Inoue, H.; Inazu, M.; Yamada, H.; Halbritter, J.; Seki, G.; Konishi, M.; et al. Mutation of the Mg2+ transporter SLC41A1 results in a nephronophthisis-like phenotype. J Am Soc Nephrol 2013, 24, 967-977, doi:10.1681/asn.2012101034.
17	Halbritter, J.; Bizet, A.A.; Schmidts, M.; Porath, J.D.; Braun, D.A.; Gee, H.Y.; McInerney-Leo, A.M.; Krug, P.; Filhol, E.; Davis, E.E.; et al. Defects in the IFT-B component IFT172 cause Jeune and Mainzer-Saldino syndromes in humans. Am J Hum Genet 2013, 93, 915-925, doi:10.1016/j.ajhg.2013.09.012.
18	van der Klift, H.M.; Jansen, A.M.; van der Steenstraten, N.; Bik, E.C.; Tops, C.M.; Devilee, P.; Wijnen, J.T. Splicing analysis for exonic and intronic mismatch repair gene variants associated with Lynch syndrome confirms high concordance between minigene assays and patient RNA analyses. Mol Genet Genomic Med 2015, 3, 327-345, doi:10.1002/mgg3.145.
19	Zhang, R.; Chen, Z.; Song, Q.; Wang, S.; Liu, Z.; Zhao, X.; Shi, X.; Guo, W.; Lang, Y.; Bottillo, I.; et al. Identification of seven exonic variants in the SLC4A1, ATP6V1B1, and ATP6V0A4 genes that alter RNA splicing by minigene assay. Hum Mutat 2021, 42, 1153-1164, doi:10.1002/humu.24246.
20	Hao, Z.; Jin, D.Y.; Chen, X.; Schurgers, L.J.; Stafford, D.W.; Tie, J.K. γ-Glutamyl carboxylase mutations differentially affect the biological function of vitamin K-dependent proteins. Blood 2021, 137, 533-543, doi:10.1182/blood.2020006329.
21	Gok, F.; Chefetz, I.; Indelman, M.; Kocaoglu, M.; Sprecher, E. Newly discovered mutations in the GALNT3 gene causing autosomal recessive hyperostosis-hyperphosphatemia syndrome. Acta Orthop 2009, 80, 131-134, doi:10.1080/17453670902807482.
22	Chandrasekharappa, S.C.; Lach, F.P.; Kimble, D.C.; Kamat, A.; Teer, J.K.; Donovan, F.X.; Flynn, E.; Sen, S.K.; Thongthip, S.; Sanborn, E.; et al. Massively parallel sequencing, aCGH, and RNA-Seq technologies provide a comprehensive molecular diagnosis of Fanconi anemia. Blood 2013, 121, e138-148, doi:10.1182/blood-2012-12-474585.
23	Hofer, D.; Paul, K.; Fantur, K.; Beck, M.; Bürger, F.; Caillaud, C.; Fumic, K.; Ledvinova, J.; Lugowska, A.; Michelakakis, H.; et al. GM1 gangliosidosis and Morquio B disease: expression analysis of missense mutations affecting the catalytic site of acid beta-galactosidase. Hum Mutat 2009, 30, 1214-1221, doi:10.1002/humu.21031.
24	Kunishima, S.; Tomii, T.; Kudo, K.; Saito, H. G to T transversion at the first nucleotide of exon 26 of the MYH9 gene results in a novel missense mutation and abnormal splicing in platelets: comment on "A G to C transversion at the last nucleotide of exon 25 of the MYH9 gene results in a missense mutation rather than in a splicing defecton" by Vettore et al. Eur J Med Genet 2012, 55, 763-765, doi…
25	Xiong, H.Y.; Alipanahi, B.; Lee, L.J.; Bretschneider, H.; Merico, D.; Yuen, R.K.; Hua, Y.; Gueroussov, S.; Najafabadi, H.S.; Hughes, T.R.; et al. RNA splicing. The human splicing code reveals new insights into the genetic determinants of disease. Science 2015, 347, 1254806, doi:10.1126/science.1254806.
26	Grodecká, L.; Lockerová, P.; Ravčuková, B.; Buratti, E.; Baralle, F.E.; Dušek, L.; Freiberger, T. Exon first nucleotide mutations in splicing: evaluation of in silico prediction tools. PLoS One 2014, 9, e89570, doi:10.1371/journal.pone.0089570.
27	Fu, Y.; Masuda, A.; Ito, M.; Shinmi, J.; Ohno, K. AG-dependent 3'-splice sites are predisposed to aberrant splicing due to a mutation at the first nucleotide of an exon. Nucleic Acids Res 2011, 39, 4396-4404, doi:10.1093/nar/gkr026.
28	Perdomo-Ramirez, A.; de Armas-Ortiz, M.; Ramos-Trujillo, E.; Suarez-Artiles, L.; Claverie-Martin, F. Exonic CLDN16 mutations associated with familial hypomagnesemia with hypercalciuria and nephrocalcinosis can induce deleterious mRNA alterations. BMC Med Genet 2019, 20, 6, doi:10.1186/s12881-018-0713-7.
29	Iida, K.; Ohkuma, Y.; Hayashi, T.; Katagiri, S.; Fujita, T.; Tsunoda, K.; Yamada, H.; Tsuneoka, H. A novel heterozygous splice site OPA1 mutation causes exon 10 skipping in Japanese patients with dominant optic atrophy. Ophthalmic Genet 2016, 37, 354-356, doi:10.3109/13816810.2015.1066829.
30	Schimpf, S.; Schaich, S.; Wissinger, B. Activation of cryptic splice sites is a frequent splicing defect mechanism caused by mutations in exon and intron sequences of the OPA1 gene. Hum Genet 2006, 118, 767-771, doi:10.1007/s00439-005-0096-7.
31	Lee, K.E.; Lee, S.K.; Jung, S.E.; Lee, Z.; Kim, J.W. Functional splicing assay of DSPP mutations in hereditary dentin defects. Oral Dis 2011, 17, 690-695, doi:10.1111/j.1601-0825.2011.01825.x.
32	Tan, Y.C.; Blumenfeld, J.; Michaeel, A.; Donahue, S.; Balina, M.; Parker, T.; Levine, D.; Rennert, H. Aberrant PKD2 splicing due to a presumed novel missense mutation in autosomal-dominant polycystic kidney disease. Clin Genet 2011, 80, 287-292, doi:10.1111/j.1399-0004.2010.01555.x.
33	Pons, V.; Rolland, C.; Nauze, M.; Danjoux, M.; Gaibelet, G.; Durandy, A.; Sassolas, A.; Lévy, E.; Tercé, F.; Collet, X.; et al. A severe form of abetalipoproteinemia caused by new splicing mutations of microsomal triglyceride transfer protein (MTTP). Hum Mutat 2011, 32, 751-759, doi:10.1002/humu.21494.
34	Pié, J.; Gil-Rodríguez, M.C.; Ciero, M.; López-Viñas, E.; Ribate, M.P.; Arnedo, M.; Deardorff, M.A.; Puisac, B.; Legarreta, J.; de Karam, J.C.; et al. Mutations and variants in the cohesion factor genes NIPBL, SMC1A, and SMC3 in a cohort of 30 unrelated patients with Cornelia de Lange syndrome. Am J Med Genet A 2010, 152a, 924-929, doi:10.1002/ajmg.a.33348.
35	Bai, J.; Qu, Y.; Song, F.; Cao, Y.; Cheng, M.; Wang, J.; Jin, Y.; Wang, H. Dual Mechanism of a New SMN1 Variant (c.835G>C, p.Gly279Arg) by Interrupting Exon 7 Skipping and YG Oligomerization in Causation of Spinal Muscular Atrophy. J Mol Neurosci 2021, 71, 112-121, doi:10.1007/s12031-020-01631-7.
36	Aretz, S.; Uhlhaas, S.; Sun, Y.; Pagenstecher, C.; Mangold, E.; Caspari, R.; Möslein, G.; Schulmann, K.; Propping, P.; Friedl, W. Familial adenomatous polyposis: aberrant splicing due to missense or silent mutations in the APC gene. Hum Mutat 2004, 24, 370-380, doi:10.1002/humu.20087.
37	Grandval, P.; Blayau, M.; Buisine, M.P.; Coulet, F.; Maugard, C.; Pinson, S.; Remenieras, A.; Tinat, J.; Uhrhammer, N.; Béroud, C.; et al. The UMD-APC database, a model of nation-wide knowledge base: update with data from 3,581 variations. Hum Mutat 2014, 35, 532-536, doi:10.1002/humu.22539.
38	Grodecká, L.; Hujová, P.; Kramárek, M.; Kršjaková, T.; Kováčová, T.; Vondrášková, K.; Ravčuková, B.; Hrnčířová, K.; Souček, P.; Freiberger, T. Systematic analysis of splicing defects in selected primary immunodeficiencies-related genes. Clin Immunol 2017, 180, 33-44, doi:10.1016/j.clim.2017.03.010.
39	Cao, X.; Hong, Y.; Eu, K.W.; Loi, C.; Cheah, P.Y. Singapore familial adenomatous polyposis (FAP) patients with classical adenomatous polyposis but undetectable APC mutations have accelerated cancer progression. Am J Gastroenterol 2006, 101, 2810-2817, doi:10.1111/j.1572-0241.2006.00842.x.
40	Huang, C.H.; Cheng, G.; Liu, Z.; Chen, Y.; Reid, M.E.; Halverson, G.; Okubo, Y. Molecular basis for Rh(null) syndrome: identification of three new missense mutations in the Rh50 glycoprotein gene. Am J Hematol 1999, 62, 25-32, doi:10.1002/(sici)1096-8652(199909)62:1<25::aid-ajh5>3.0.co;2-k.
41	Wai, H.A.; Lord, J.; Lyon, M.; Gunning, A.; Kelly, H.; Cibin, P.; Seaby, E.G.; Spiers-Fitzgerald, K.; Lye, J.; Ellard, S.; et al. Correction: Blood RNA analysis can increase clinical diagnostic rate and resolve variants of uncertain significance. Genet Med 2020, 22, 1129, doi:10.1038/s41436-020-0789-2.
42	Rees, D.C.; Duley, J.A.; Marinaki, A.M. Pyrimidine 5' nucleotidase deficiency. Br J Haematol 2003, 120, 375-383, doi:10.1046/j.1365-2141.2003.03980.x.
43	Li, L.; Cao, Y.; Zhao, F.; Mao, B.; Ren, X.; Wang, Y.; Guan, Y.; You, Y.; Li, S.; Yang, T.; et al. Validation and Classification of Atypical Splicing Variants Associated With Osteogenesis Imperfecta. Front Genet 2019, 10, 979, doi:10.3389/fgene.2019.00979.
44	Rymen, D.; Keldermans, L.; Race, V.; Régal, L.; Deconinck, N.; Dionisi-Vici, C.; Fung, C.W.; Sturiale, L.; Rosnoblet, C.; Foulquier, F.; et al. COG5-CDG: expanding the clinical spectrum. Orphanet J Rare Dis 2012, 7, 94, doi:10.1186/1750-1172-7-94.
45	Will, K.; Dörk, T.; Stuhrmann, M.; Meitinger, T.; Bertele-Harms, R.; Tümmler, B.; Schmidtke, J. A novel exon in the cystic fibrosis transmembrane conductance regulator gene activated by the nonsense mutation E92X in airway epithelial cells of patients with cystic fibrosis. J Clin Invest 1994, 93, 1852-1859, doi:10.1172/jci117172.
46	Joynt, A.T.; Evans, T.A.; Pellicore, M.J.; Davis-Marcisak, E.F.; Aksit, M.A.; Eastman, A.C.; Patel, S.U.; Paul, K.C.; Osorio, D.L.; Bowling, A.D.; et al. Evaluation of both exonic and intronic variants for effects on RNA splicing allows for accurate assessment of the effectiveness of precision therapies. PLoS Genet 2020, 16, e1009100, doi:10.1371/journal.pgen.1009100.
47	Leman, R.; Gaildrat, P.; Le Gac, G.; Ka, C.; Fichou, Y.; Audrezet, M.P.; Caux-Moncoutier, V.; Caputo, S.M.; Boutry-Kryza, N.; Léone, M.; et al. Novel diagnostic tool for prediction of variant spliceogenicity derived from a set of 395 combined in silico/in vitro studies: an international collaborative effort. Nucleic Acids Res 2018, 46, 7913-7923, doi:10.1093/nar/gky372.
48	Hinzpeter, A.; Aissat, A.; Sondo, E.; Costa, C.; Arous, N.; Gameiro, C.; Martin, N.; Tarze, A.; Weiss, L.; de Becdelièvre, A.; et al. Alternative splicing at a NAGNAG acceptor site as a novel phenotype modifier. PLoS Genet 2010, 6, doi:10.1371/journal.pgen.1001153.
49	Ulzi, G.; Sansone, V.A.; Magri, F.; Corti, S.; Bresolin, N.; Comi, G.P.; Lucchiari, S. In vitro analysis of splice site mutations in the CLCN1 gene using the minigene assay. Mol Biol Rep 2014, 41, 2865-2874, doi:10.1007/s11033-014-3142-5.
50	Alvarez, C.; Tredwell, S.; De Vera, M.; Hayden, M. The genotype-phenotype correlation of hereditary multiple exostoses. Clin Genet 2006, 70, 122-130, doi:10.1111/j.1399-0004.2006.00653.x.
51	Narumi, S.; Muroya, K.; Asakura, Y.; Aachi, M.; Hasegawa, T. Molecular basis of thyroid dyshormonogenesis: genetic screening in population-based Japanese patients. J Clin Endocrinol Metab 2011, 96, E1838-1842, doi:10.1210/jc.2011-1573.
52	Zariwala, M.A.; Leigh, M.W.; Ceppa, F.; Kennedy, M.P.; Noone, P.G.; Carson, J.L.; Hazucha, M.J.; Lori, A.; Horvath, J.; Olbrich, H.; et al. Mutations of DNAI1 in primary ciliary dyskinesia: evidence of founder effect in a common mutation. Am J Respir Crit Care Med 2006, 174, 858-866, doi:10.1164/rccm.200603-370OC.
53	Fedick, A.M.; Jalas, C.; Treff, N.R.; Knowles, M.R.; Zariwala, M.A. Carrier frequencies of eleven mutations in eight genes associated with primary ciliary dyskinesia in the Ashkenazi Jewish population. Mol Genet Genomic Med 2015, 3, 137-142, doi:10.1002/mgg3.124.
54	Crespo, C.; Eiroa, H.; Otegui, M.I.; Bonetto, M.C.; Chertkoff, L.; Gravina, L.P. Molecular analysis of GALT gene in Argentinian population: Correlation with enzyme activity and characterization of a novel Duarte-like allele. Mol Genet Metab Rep 2020, 25, 100695, doi:10.1016/j.ymgmr.2020.100695.
55	Levy-Khademi, F.; Zeligson, S.; Lavi, E.; Klopstock, T.; Chertin, B.; Avnon-Ziv, C.; Abulibdeh, A.; Renbaum, P.; Rosen, T.; Perlberg-Bengio, S.; et al. The novel founder homozygous V225M mutation in the HSD17B3 gene causes aberrant splicing and XY-DSD. Endocrine 2020, 69, 650-654, doi:10.1007/s12020-020-02327-z.
56	Soemedi, R.; Cygan, K.J.; Rhine, C.L.; Wang, J.; Bulacan, C.; Yang, J.; Bayrak-Toydemir, P.; McDonald, J.; Fairbrother, W.G. Pathogenic variants that alter protein code often disrupt splicing. Nat Genet 2017, 49, 848-855, doi:10.1038/ng.3837.
57	Astuto, L.M.; Bork, J.M.; Weston, M.D.; Askew, J.W.; Fields, R.R.; Orten, D.J.; Ohliger, S.J.; Riazuddin, S.; Morell, R.J.; Khan, S.; et al. CDH23 mutation and phenotype heterogeneity: a profile of 107 diverse families with Usher syndrome and nonsyndromic deafness. Am J Hum Genet 2002, 71, 262-275, doi:10.1086/341558.
58	Singer, E.S.; Ingles, J.; Semsarian, C.; Bagnall, R.D. Key Value of RNA Analysis of MYBPC3 Splice-Site Variants in Hypertrophic Cardiomyopathy. Circ Genom Precis Med 2019, 12, e002368, doi:10.1161/circgen.118.002368.
59	Valente, E.M.; Logan, C.V.; Mougou-Zerelli, S.; Lee, J.H.; Silhavy, J.L.; Brancati, F.; Iannicelli, M.; Travaglini, L.; Romani, S.; Illi, B.; et al. Mutations in TMEM216 perturb ciliogenesis and cause Joubert, Meckel and related syndromes. Nat Genet 2010, 42, 619-625, doi:10.1038/ng.594.
60	Adachi, K.; Yagi, M.; Ito, T.; Takeshima, Y.; Nishio, H.; Wada, H.; Nakamura, H.; Matsuo, M. [Dystrophin gene analysis on 76 families with dystrophinopathy]. No To Hattatsu 2002, 34, 391-397.
61	Paglia, L.L.; Laugé, A.; Weber, J.; Champ, J.; Cavaciuti, E.; Russo, A.; Viovy, J.L.; Stoppa-Lyonnet, D. ATM germline mutations in women with familial breast cancer and a relative with haematological malignancy. Breast Cancer Res Treat 2010, 119, 443-452, doi:10.1007/s10549-009-0396-z.
62	Zou, M.; Guven, A.; BinEssa, H.A.; Al-Rijjal, R.A.; Meyer, B.F.; Alzahrani, A.S.; Shi, Y. Molecular Analysis of CYP27B1 Mutations in Vitamin D-Dependent Rickets Type 1A: c.590G > A (p.G197D) Missense Mutation Causes a RNA Splicing Error. Front Genet 2020, 11, 607517, doi:10.3389/fgene.2020.607517.
63	Scala, M.; Brigati, G.; Fiorillo, C.; Nesti, C.; Rubegni, A.; Pedemonte, M.; Bruno, C.; Severino, M.; Derchi, M.; Minetti, C.; et al. Novel homozygous TSFM pathogenic variant associated with encephalocardiomyopathy with sensorineural hearing loss and peculiar neuroradiologic findings. Neurogenetics 2019, 20, 165-172, doi:10.1007/s10048-019-00582-5.
64	Baert, A.; Machackova, E.; Coene, I.; Cremin, C.; Turner, K.; Portigal-Todd, C.; Asrat, M.J.; Nuk, J.; Mindlin, A.; Young, S.; et al. Thorough in silico and in vitro cDNA analysis of 21 putative BRCA1 and BRCA2 splice variants and a complex tandem duplication in BRCA2 allowing the identification of activated cryptic splice donor sites in BRCA2 exon 11. Hum Mutat 2018, 39, 515-526, doi:10.1002/hum…
65	Fraile-Bethencourt, E.; Valenzuela-Palomo, A.; Díez-Gómez, B.; Goina, E.; Acedo, A.; Buratti, E.; Velasco, E.A. Mis-splicing in breast cancer: identification of pathogenic BRCA2 variants by systematic minigene assays. J Pathol 2019, 248, 409-420, doi:10.1002/path.5268.
66	Gaildrat, P.; Krieger, S.; Di Giacomo, D.; Abdat, J.; Révillion, F.; Caputo, S.; Vaur, D.; Jamard, E.; Bohers, E.; Ledemeney, D.; et al. Multiple sequence variants of BRCA2 exon 7 alter splicing regulation. J Med Genet 2012, 49, 609-617, doi:10.1136/jmedgenet-2012-100965.
67	Hujová, P.; Grodecká, L.; Souček, P.; Freiberger, T. Impact of acceptor splice site NAGTAG motif on exon recognition. Mol Biol Rep 2019, 46, 2877-2884, doi:10.1007/s11033-019-04734-6.
68	Cygan, K.J.; Soemedi, R.; Rhine, C.L.; Profeta, A.; Murphy, E.L.; Murray, M.F.; Fairbrother, W.G. Defective splicing of the RB1 transcript is the dominant cause of retinoblastomas. Hum Genet 2017, 136, 1303-1312, doi:10.1007/s00439-017-1833-4.
69	Houdayer, C.; Dehainault, C.; Mattler, C.; Michaux, D.; Caux-Moncoutier, V.; Pagès-Berhouet, S.; d'Enghien, C.D.; Laugé, A.; Castera, L.; Gauthier-Villars, M.; et al. Evaluation of in silico splice tools for decision-making in molecular diagnosis. Hum Mutat 2008, 29, 975-982, doi:10.1002/humu.20765.
70	Desviat, L.R.; Clavero, S.; Perez-Cerdá, C.; Navarrete, R.; Ugarte, M.; Perez, B. New splicing mutations in propionic acidemia. J Hum Genet 2006, 51, 992-997, doi:10.1007/s10038-006-0068-3.
71	Aridon, P.; De Fusco, M.; Winkelmann, J.W.; Zucconi, M.; Arnao, V.; Ferini-Strambi, L.; Casari, G. A TRAPPC6B splicing variant associates to restless legs syndrome. Parkinsonism Relat Disord 2016, 31, 135-138, doi:10.1016/j.parkreldis.2016.08.016.
72	Bartsch, O.; Kress, W.; Kempf, O.; Lechno, S.; Haaf, T.; Zechner, U. Inheritance and variable expression in Rubinstein-Taybi syndrome. Am J Med Genet A 2010, 152a, 2254-2261, doi:10.1002/ajmg.a.33598.
73	Wang, S.; Wang, Y.; Wang, J.; Liu, Z.; Zhang, R.; Shi, X.; Han, Y.; Guo, W.; Bottillo, I.; Shao, L. Six Exonic Variants in the SLC5A2 Gene Cause Exon Skipping in a Minigene Assay. Front Genet 2020, 11, 585064, doi:10.3389/fgene.2020.585064.
74	Olbrich, H.; Schmidts, M.; Werner, C.; Onoufriadis, A.; Loges, N.T.; Raidt, J.; Banki, N.F.; Shoemark, A.; Burgoyne, T.; Al Turki, S.; et al. Recessive HYDIN mutations cause primary ciliary dyskinesia without randomization of left-right body asymmetry. Am J Hum Genet 2012, 91, 672-684, doi:10.1016/j.ajhg.2012.08.016.
75	Esposito, T.; Piluso, G.; Saracino, D.; Uccello, R.; Schettino, C.; Dato, C.; Capaldo, G.; Giugliano, T.; Varriale, B.; Paolisso, G.; et al. A novel diagnostic method to detect truncated neurofibromin in neurofibromatosis 1. J Neurochem 2015, 135, 1123-1128, doi:10.1111/jnc.13396.
76	Zhao, D.; Yang, J.; Guo, Z.; Li, R. [A novel splicing mutation in COL1A1 gene caused type I osteogenesis imperfecta in a Chinese family]. Zhonghua Yi Xue Yi Chuan Xue Za Zhi 2014, 31, 189-191, doi:10.3760/cma.j.issn.1003-9406.2014.02.013.
77	Shariat, N.; Holladay, C.D.; Cleary, R.K.; Phillips, J.A., 3rd; Patton, J.G. Isolated growth hormone deficiency type II caused by a point mutation that alters both splice site strength and splicing enhancer function. Clin Genet 2008, 74, 539-545, doi:10.1111/j.1399-0004.2008.01042.x.
78	Storr, H.L.; Metherell, L.A.; Dias, R.; Savage, M.O.; Rasmussen, A.K.; Clark, A.J.; Main, K.M. Familial isolated primary pigmented nodular adrenocortical disease associated with a novel low penetrance PRKAR1A gene splice site mutation. Horm Res Paediatr 2010, 73, 115-119, doi:10.1159/000277629.
79	Xue, J.Y.; Wang, Z.; Shinagawa, S.; Ohashi, H.; Otomo, N.; Elcioglu, N.H.; Nakashima, T.; Nishimura, G.; Ikegawa, S.; Guo, L. TNFRSF11A-Associated Dysosteosclerosis: A Report of the Second Case and Characterization of the Phenotypic Spectrum. J Bone Miner Res 2019, 34, 1873-1879, doi:10.1002/jbmr.3805.
80	Rodero, M.P.; Tesser, A.; Bartok, E.; Rice, G.I.; Della Mina, E.; Depp, M.; Beitz, B.; Bondet, V.; Cagnard, N.; Duffy, D.; et al. Type I interferon-mediated autoinflammation due to DNase II deficiency. Nat Commun 2017, 8, 2176, doi:10.1038/s41467-017-01932-3.
81	Kott, E.; Legendre, M.; Copin, B.; Papon, J.F.; Dastot-Le Moal, F.; Montantin, G.; Duquesnoy, P.; Piterboth, W.; Amram, D.; Bassinet, L.; et al. Loss-of-function mutations in RSPH1 cause primary ciliary dyskinesia with central-complex and radial-spoke defects. Am J Hum Genet 2013, 93, 561-570, doi:10.1016/j.ajhg.2013.07.013.
82	Sun, J.; Wang, Y.; Liu, D.; Yu, Y.; Wang, J.; Ying, W.; Wang, X. Prenatal diagnosis of X-linked chronic granulomatous disease by percutaneous umbilical blood sampling. Scand J Immunol 2012, 76, 512-518, doi:10.1111/j.1365-3083.2012.02772.x.
83	Skjørringe, T.; Tümer, Z.; Møller, L.B. Splice site mutations in the ATP7A gene. PLoS One 2011, 6, e18599, doi:10.1371/journal.pone.0018599.
84	Lualdi, S.; Pittis, M.G.; Regis, S.; Parini, R.; Allegri, A.E.; Furlan, F.; Bembi, B.; Filocamo, M. Multiple cryptic splice sites can be activated by IDS point mutations generating misspliced transcripts. J Mol Med (Berl) 2006, 84, 692-700, doi:10.1007/s00109-006-0057-1.
85	Balestra, D.; Maestri, I.; Branchini, A.; Ferrarese, M.; Bernardi, F.; Pinotti, M. An Altered Splicing Registry Explains the Differential ExSpeU1-Mediated Rescue of Splicing Mutations Causing Haemophilia A. Front Genet 2019, 10, 974, doi:10.3389/fgene.2019.00974.
86	Crehalet, H.; Millat, G.; Albuisson, J.; Bonnet, V.; Rouvet, I.; Rousson, R.; Bozon, D. Combined use of in silico and in vitrosplicing assays for interpretation of genomic variants of unknown significance in cardiomyopathies and channelopathies. Carcinogenetics 2012, 2, e6.

## Sheet: Neutral
Supplementary Table S1b. 106 neutral Fex-SNVs
Chrom	GRCh37/hg19	Strand	Ref	Alt	Global MAF	dbSNP	Reference
chr1	9777122	+	G	A	0.03195	rs28730668	[1]
chr1	10190773	+	G	A	0.03974	rs17034499
chr1	23997401	+	G	A	0.01038	rs116436791
chr1	26526375	+	G	A	0.006789	rs144835190
chr1	26664968	-	C	T	0.2861	rs11247919
chr1	27428621	-	C	T	0.008187	rs139314838
chr1	36945681	-	C	A	0.01078	rs3917923
chr1	44679335	+	G	A	0.007987	rs145692550
chr1	107946262	+	G	A	0.4179	rs12126267
chr1	192606720	+	G	T	0.01997	rs78203847
chr1	207512742	+	G	C			[1]
chr2	2309927	-	C	A	0.1843	rs7580422
chr2	81008127	-	C	A	0.01238	rs116579007
chr2	186903159	-	C	A	0.05391	rs10196464
chr2	225706613	-	C	T	0.02256	rs144638149
chr3	8719039	-	C	G	0.05192	rs113882955
chr3	109047928	-	C	T	0.1562	rs1163439
chr3	121155122	-	C	T	0.007388	rs41540016
chr3	132416206	-	C	T	0.01597	rs77533254
chr3	155523512	-	C	T	0.05312	rs73003554
chr3	197701913	+	G	T	0.2095	rs7373165
chr4	22348446	-	C	A	0.01338	rs10029265
chr4	38570708	+	G	A	0.2161	rs7654396
chr4	68534392	-	C	T	0.155	rs10010188
chr4	113468564	-	C	T	0.01917	rs78336146
chr4	121652945	-	C	A	0.02815	rs76650962
chr4	159158677	+	G	A	0.07808	rs12504074
chr4	166606936	+	G	A	0.07109	rs80303176
chr4	185300283	-	C	G	0.009385	rs116945722
chr5	5059677	+	G	A	0.06789	rs13436478
chr5	68398889	+	G	T	0.03035	rs28450427
chr5	72121562	+	G	T	0.01338	rs10075937
chr5	149826526	-	C	T	0.2684	rs4841
chr6	29975095	+	G	C	0.04952	rs6940082
chr6	30384283	+	G	A	0.005791	rs11756914
chr6	32370993	-	C	T	0.02696	rs115653647
chr6	32634447	-	C	G	0.06589	rs3210146
chr6	33048466	+	G	T	0.271	rs1126511
chr6	49580247	-	C	T	0.06969	rs16879498	[1]
chr6	65612113	-	C	T	0.02616	rs77020971
chr6	109621434	+	G	T	0.03355	rs78351760
chr6	139197609	+	G	A	0.2762	rs1529151
chr7	5880392	+	G	C	0.1579	rs2240405
chr7	48643310	+	G	A	0.229	rs7803560
chr7	72178756	-	C	A	0.1262	rs146095374
chr7	102723513	+	G	A	0.01677	rs28482805
chr7	141540868	-	C	A	0.01538	rs73525255
chr8	42849577	+	G	A	0.005192	rs191545829
chr9	4833154	+	G	A	0.01577	rs34215378
chr9	21813765	+	G	A	0.04653	rs10965146
chr9	34257979	-	C	T	0.04772	rs76547823
chr9	138440554	+	G	C	0.1735	rs55695858
chr9	139110654	-	C	T	0.1532	rs12684650
chr10	15153685	+	G	A	0.00599	rs112358622
chr10	43191254	-	C	G	0.2246	rs7088389
chr10	98006805	-	C	T	0.03734	rs11540858
chr11	2190925	-	C	T	0.01617	rs76240471
chr11	16824599	-	C	T	0.00619	rs34556458
chr11	17548878	-	C	T	0.01298	rs55843567
chr11	31703335	+	G	C	0.01957	rs141543586
chr11	34916657	-	C	T	0.1146	rs61734605
chr11	82985806	-	C	A	0.01338	rs115690042
chr12	6836837	+	G	T	0.0627	rs66951403
chr12	7030660	+	G	A	0.02975	rs115894573
chr12	108152052	+	G	A	0.00599	rs375180436
chr12	121176083	+	G	A	0.1823	rs1799958
chr12	133272470	+	G	T	0.05651	rs74727297
chr13	32954144	+	G	A			[1]
chr13	43463378	-	C	T	0.02815	rs79111014
chr13	52080679	+	G	A	0.4615	rs9526773
chr13	95859035	-	C	A	0.1506	rs2274407
chr15	21137651	-	C	T	0.02756	rs925312
chr15	52510884	-	C	G	0.02077	rs73404874
chr15	75654366	-	C	G	0.04473	rs3803464
chr15	94841430	+	G	A	0.1749	rs79161311
chr16	840531	+	G	A	0.007788	rs114122804
chr16	11594825	-	C	T	0.02037	rs71383272
chr16	19710824	+	G	A	0.007788	rs34342607
chr16	22865985	+	G	A	0.008586	rs142571042
chr17	11835331	+	G	A	0.2101	rs17612861
chr17	25999628	-	C	T	0.2492	rs7220339
chr17	41290674	+	G	C	0.3528	rs2292595
chr17	58263012	-	C	T	0.006989	rs77024136
chr17	61198167	-	C	T	0.4545	rs28534579
chr17	72548117	-	C	T	0.03095	rs1699569
chr17	73235099	-	C	T	0.007388	rs76982026
chr17	73588058	+	G	T	0.2368	rs736522
chr17	79784391	-	C	T	0.2001	rs140438341
chr18	1626240	+	G	T	0.01318	rs116114268
chr18	25727748	-	C	T	0.008986	rs17495042
chr18	74599977	-	C	T	0.1544	rs17060015
chr18	77704680	-	C	T	0.01857	rs111363895
chr19	373531	-	C	T	0.03714	rs73489977
chr19	14527217	-	C	G	0.01438	rs185725199
chr19	33444707	-	C	T	0.3984	rs10411735
chr19	45448695	+	G	A	0.03275	rs10425530
chr19	48235322	+	G	A	0.007588	rs368031838
chr19	51411751	-	C	T	0.01917	rs34626614
chr19	54556228	-	C	G	0.1617	rs77931596
chr19	55349031	+	G	A	0.1236	rs58731871
chr20	47273726	-	C	T	0.1603	rs55904123
chr20	47795781	-	C	T	0.01538	rs148170165
chr22	17588617	+	G	C			[1]
chr22	20961109	-	C	T	0.2027	rs13340098
chr22	20976088	-	C	A	0.02177	rs78003513
chrX	77286898	+	G	A			[1]
Reference
1	Grodecká, L.; Lockerová, P.; Ravčuková, B.; Buratti, E.; Baralle, F.E.; Dušek, L.; Freiberger, T. Exon first nucleotide mutations in splicing: evaluation of in silico prediction tools. PLoS One 2014, 9, e89570, doi:10.1371/journal.pone.0089570.
